# Supplementary material for: Comparative metabolomic analysis reveals global cadmium stress response ofLactobacillus plantarumstrains
Source: Royal Society of Chemistry journal article supplement (doi:10.1039/c8mt00095f), 2018-01-01
Supplement: c8mt00095f1.pdf [file c8mt00095f1.pdf]

## Supporting information

### Comparative Metabolomic Analysis Reveals Global Cadmium Stress Response of *Lactobacillus plantarum* Strains

Qixiao Zhai<sup>a,b,d#</sup>, Yue Xiao<sup>a,b#</sup>, Arjan Narbad<sup>d,e</sup> and Wei Chen<sup>a, b, c, f\*</sup>

<sup>a</sup> State Key Laboratory of Food Science and Technology, Jiangnan University, Wuxi, Jiangsu 214122, People's Republic of China

<sup>b</sup> School of Food Science and Technology, Jiangnan University, Wuxi, Jiangsu 214122, China

<sup>c</sup> National Engineering Research Center for Functional Food, Jiangnan University, Wuxi, Jiangsu 214122, China

<sup>d</sup> International Joint Research Laboratory for Probiotics at Jiangnan University, Wuxi, Jiangsu 214122, China

<sup>e</sup> Gut Health and Food Safety Programme, Quadram Institute Bioscience, Norwich Research Park, NR4 7UA, United Kingdom

<sup>f</sup> Beijing Innovation Centre of Food Nutrition and Human Health, Beijing Technology and Business University (BTBU), Beijing 100048, P.R. China

<sup>#</sup>These authors contribute equally to the work.

\* Corresponding author: Wei Chen.

Tel: 86-510-85912155; Fax: 86-510-85912155

E-mail address: [chenwei66@jiangnan.edu.cn](mailto:chenwei66@jiangnan.edu.cn)

## **List of supplemental information**

Supplemental Table S1. Differentially synthesized metabolites between *Lactobacillus plantarum* CCFM8610 and CCFM191 in Cd-free conditions.

Supplemental Table S2. Changed metabolites in *Lactobacillus plantarum* CCFM8610 after Cd exposure.

Supplemental Table S3. Changed metabolites in *Lactobacillus plantarum* CCFM191 after Cd exposure.

Supplemental Figure S1. The representative base peak intensity (BPI) chromatogram of CCFM8610 without Cd in positive ion mode.

Supplemental Figure S2. The representative BPI chromatogram of CCFM8610 with Cd in positive ion mode.

Supplemental Figure S3. The representative BPI chromatogram of CCFM191 without Cd in positive ion mode.

Supplemental Figure S4. The representative BPI chromatogram of CCFM191 with Cd in positive ion mode.

Supplemental Figure S5. The representative BPI chromatogram of CCFM8610 without Cd in negative ion mode.

Supplemental Figure S6. The representative BPI chromatogram of CCFM8610 with Cd in negative ion mode.

Supplemental Figure S7. The representative BPI chromatogram of CCFM191 without Cd in negative ion mode.

Supplemental Figure S8. The representative BPI chromatogram of CCFM191 with Cd in negative ion mode.

Supplemental Figure S9. Cross-validation of the pair-wise orthogonal partial least-squares discriminant analysis (OPLS-DA) model of CCFM8610/CCFM191.

Supplemental Figure S10. Cross-validation of the OPLS-DA model of CCFM8610(Cd)/8610(0).

Supplemental Figure S11. Cross-validation of the OPLS-DA model of CCFM191(Cd)/CCFM191(0).

Table S1 Differentially synthesized metabolites between *Lactobacillus plantarum* CCFM8610 and CCFM191 in Cd-free conditions

| M/Z <sup>a</sup> | R.T.<br>(min) <sup>b</sup> | Ion<br>mode | Metabolites                                                               | Adduct <sup>c</sup>     | $\Delta m^d$ | VIP   | <i>P</i> value <sup>e</sup> | Fold<br>change <sup>f</sup> |
|------------------|----------------------------|-------------|---------------------------------------------------------------------------|-------------------------|--------------|-------|-----------------------------|-----------------------------|
| 377.086          | 0.698                      | NEG         | D-Lactose                                                                 | [M+Cl]-                 | 0.00080      | 23.85 | 9.8E-20                     | 0.05                        |
| 179.056          | 0.714                      | NEG         | D-Fructose                                                                | [M-H]-                  | -0.00010     | 9.62  | 7.4E-14                     | 7.70                        |
| 446.187          | 0.735                      | POS         | b-D-Xylopyranosyl-(1->4)-a-L-rhamnopyranosyl-(1->2)-L-arabinose           | [M+NH <sub>4</sub> ]+   | 0.00230      | 2.50  | 3.5E-13                     | 0.07                        |
| 593.195          | 0.743                      | NEG         | punaglandin                                                               | [M+Cl]-                 | 0.00310      | 2.11  | 2.1E-12                     | 0.09                        |
| 630.223          | 1.096                      | NEG         | 7-Sulfocholytaurine                                                       | [M+Cl]-                 | 0.00620      | 2.69  | 3.8E-12                     | 0.36                        |
| 365.106          | 0.701                      | POS         | Sucrose                                                                   | [M+Na]+                 | 0.00010      | 5.63  | 2.6E-11                     | 0.06                        |
| 387.116          | 0.670                      | NEG         | Fructoselysine 6-phosphate                                                | [M-H]-                  | -0.00180     | 4.06  | 7.8E-11                     | 0.15                        |
| 431.109          | 0.740                      | NEG         | TyrMe-Asp-OH                                                              | [M-H]-                  | -0.00070     | 2.35  | 1.5E-10                     | 0.16                        |
| 784.149          | 4.370                      | NEG         | Flavin adenine dinucleotide (FAD)                                         | [M-H]-                  | -0.00080     | 3.50  | 7.7E-10                     | 2.03                        |
| 146.046          | 0.732                      | NEG         | L-Glutamate                                                               | [M-H]-                  | 0.00020      | 7.14  | 1.2E-09                     | 1.88                        |
| 381.079          | 0.691                      | POS         | Dihydrocaffeic acid 3-O-glucuronide                                       | [M+Na]+                 | 0.00010      | 4.28  | 3.6E-09                     | 0.09                        |
| 513.025          | 0.706                      | NEG         | Fucofuroeckol B                                                           | [M+Cl]-                 | 0.00250      | 2.33  | 5.6E-09                     | 0.15                        |
| 281.156          | 3.887                      | POS         | 7-(4-Hydroxyphenyl)-1-phenyl-4-hepten-3-one                               | [M+H]+                  | 0.00270      | 2.86  | 6.1E-09                     | 9.76                        |
| 455.102          | 0.673                      | NEG         | 3,5,7-Tris(acetyloxy)-8-methoxy-2-(4-methoxyphenyl)-4H-1-benzopyran-4-one | [M-H]-                  | 0.00360      | 3.91  | 6.5E-09                     | 0.06                        |
| 526.252          | 4.595                      | NEG         | N-[(3a,5b,7a,12a)-3,12-dihydroxy-24-oxo-7-(sulfoxy)cholan-24-yl]-Glycine  | [M-H <sub>2</sub> O-H]- | 0.00250      | 5.41  | 6.7E-09                     | 2.26                        |
| 439.087          | 0.722                      | NEG         | 3,5-Dihydroxyphenyl 1-O-(6-O-galloyl-beta-D-glucopyranoside)              | [M-H]-                  | -0.00160     | 10.76 | 1.2E-08                     | 0.07                        |
| 231.023          | 0.716                      | NEG         | 6,7-Benzocoumarin                                                         | [M+Cl]-                 | 0.00200      | 3.35  | 3.7E-08                     | 18.75                       |
| 338.989          | 0.814                      | NEG         | alpha-D-Glucose 1,6-biphosphate                                           | [M-H]-                  | 0.00030      | 2.16  | 4.0E-08                     | 0.25                        |
| 367.103          | 0.714                      | NEG         | 5-O-Feruloylquinic acid                                                   | [M-H]-                  | -0.00010     | 2.92  | 7.4E-08                     | 46.68                       |
| 263.197          | 0.735                      | POS         | 2-Methylbutyroylcarnitine                                                 | [M+NH <sub>4</sub> ]+   | 0.00180      | 2.75  | 8.9E-08                     | 1.74                        |
| 132.030          | 0.693                      | NEG         | L-Aspartic Acid                                                           | [M-H]-                  | -0.00040     | 4.75  | 9.3E-08                     | 2.54                        |
| 191.020          | 0.932                      | NEG         | Citric acid                                                               | [M-H]-                  | 0.00040      | 7.26  | 1.0E-07                     | 0.27                        |
| 414.199          | 1.214                      | POS         | 1-(3-Methylbutanoyl)-6-apiosylglucose                                     | [M+NH <sub>4</sub> ]+   | 0.00330      | 2.41  | 2.4E-07                     | 0.61                        |
| 565.048          | 0.824                      | NEG         | UDP-glucose                                                               | [M-H]-                  | 0.00040      | 9.68  | 4.7E-07                     | 4.71                        |
| 426.022          | 0.970                      | NEG         | Deoxyguanosine diphosphate (dGDP)                                         | [M-H]-                  | 0.00010      | 3.54  | 6.4E-07                     | 0.41                        |
| 516.231          | 1.416                      | POS         | Alpha-Trisaccharide                                                       | [M+H]+                  | 0.00190      | 3.32  | 9.5E-07                     | 0.54                        |
| 476.048          | 0.757                      | NEG         | CDP-glycerol                                                              | [M-H]-                  | 0.00070      | 3.06  | 1.1E-06                     | 5.12                        |
| 474.146          | 0.701                      | NEG         | Trp-Leu-OH                                                                | [M+Cl]-                 | 0.00340      | 2.93  | 1.8E-06                     | 0.09                        |
| 164.071          | 2.131                      | NEG         | L-Phenylalanine                                                           | [M-H]-                  | -0.00030     | 2.77  | 2.7E-06                     | 1.72                        |
| 587.159          | 0.715                      | NEG         | Aurasperone E                                                             | [M-H]-                  | 0.00340      | 3.25  | 3.1E-06                     | 0.27                        |
| 264.934          | 0.634                      | NEG         | Tris(2-chloroethyl)phosphate                                              | [M-H <sub>2</sub> O-H]- | -0.00300     | 2.27  | 5.4E-05                     | 2.01                        |
| 606.075          | 0.830                      | NEG         | Uridine diphosphate-N-acetylglucosamine                                   | [M-H]-                  | 0.00030      | 5.61  | 7.8E-05                     | 1.59                        |
| 323.029          | 0.884                      | NEG         | Uridine monophosphate (UMP)                                               | [M-H]-                  | 0.00050      | 3.17  | 1.0E-04                     | 1.96                        |
| 120.081          | 2.146                      | POS         | Tyramine                                                                  | [M+H-H <sub>2</sub> O]+ | -0.00090     | 3.15  | 1.2E-04                     | 1.52                        |
| 117.019          | 1.304                      | NEG         | Succinic acid                                                             | [M-H]-                  | 0.00010      | 2.92  | 1.6E-04                     | 1.64                        |
| 146.118          | 0.755                      | POS         | 2-amino-heptanoic acid                                                    | [M+H]+                  | 0.00000      | 7.36  | 3.1E-04                     | 1.54                        |
| 162.078          | 0.891                      | POS         | D-Galactosamine                                                           | [M+H-H <sub>2</sub> O]+ | 0.00060      | 2.45  | 8.2E-04                     | 2.04                        |
| 131.071          | 5.132                      | NEG         | D-Leucic acid                                                             | [M-H]-                  | -0.00010     | 3.54  | 1.2E-03                     | 0.65                        |
| 497.076          | 12.732                     | NEG         | dTDP-L-rhodinose                                                          | [M-H <sub>2</sub> O-H]- | 0.00170      | 6.50  | 1.3E-03                     | 2.71                        |
| 415.212          | 9.792                      | POS         | Estra-1,3,5(10)-triene-3,6alpha,17beta-triol triacetate                   | [M+H]+                  | 0.00050      | 8.04  | 1.8E-03                     | 0.62                        |
| 851.399          | 9.792                      | POS         | Digitoxigenin 3-[glucosyl-(1->6)-glucosyl-(1->4)-2,6-dideoxyribohexoside] | [M+Na]+                 | -0.00490     | 3.22  | 2.2E-03                     | 0.63                        |
| 288.290          | 8.542                      | POS         | Margaric acid                                                             | [M+NH <sub>4</sub> ]+   | 0.00220      | 3.20  | 4.2E-03                     | 0.58                        |
| 531.409          | 12.551                     | POS         | VITAMIN E SUCCINATE                                                       | [M+H]+                  | 0.00470      | 6.26  | 4.4E-03                     | 1.55                        |
| 298.097          | 4.125                      | POS         | (methylthio)adenosine                                                     | [M+H]+                  | 0.00030      | 2.35  | 5.4E-03                     | 1.57                        |
| 449.173          | 9.782                      | NEG         | Bis(3-azidopyridinium)-1,10-decane perchlorate                            | [M-H]-                  | -0.00090     | 2.69  | 5.4E-03                     | 0.62                        |
| 356.280          | 14.888                     | POS         | 5,6-dihydroxy-8,11,14-eicosatrienoic acid                                 | [M+NH <sub>4</sub> ]+   | 0.00200      | 3.03  | 6.0E-03                     | 2.02                        |
| 459.202          | 9.782                      | NEG         | Formestane-4-O-glucuronide                                                | [M-H <sub>2</sub> O-H]- | -0.00130     | 5.62  | 6.3E-03                     | 0.65                        |
| 423.057          | 11.567                     | NEG         | Asp-Phe-OH                                                                | [M+Cl]-                 | -0.00210     | 2.63  | 9.4E-03                     | 1.78                        |
| 362.051          | 0.898                      | NEG         | Guanidylic acid (guanosine monophosphate)                                 | [M-H]-                  | 0.00060      | 2.31  | 9.9E-03                     | 1.89                        |

<sup>a</sup>M/Z, mass/charge number of each peak in mass spectra. <sup>b</sup>R.T.(min), retention time of each metabolite in chromatography. <sup>c</sup>The formation of each peak in mass spectra. <sup>d</sup> $\Delta m$ , the mass discrepancies between measured values and theoretical values during metabolite identification in database HMDB and METLIN. <sup>e</sup> Differences of metabolite abundances between CCFM8610 and CCFM191 were analyzed using one-way analysis of variance (ANOVA), followed by the Tukey post hoc test. *P* < 0.05 is considered as significant. <sup>f</sup>The abundance difference of each metabolite is expressed as the ratio of the average content in CCFM8610 and in CCFM191 (CCFM8610/CCFM191) (n=6). A value >1 represents that the corresponding metabolite is in higher abundance in CCFM8610, while a

value <1 indicates that the corresponding metabolite is in lower abundance in CCFM8610.

Table S2 Changed metabolites in *Lactobacillus plantarum* CCFM8610 after Cd exposure

| M/Z <sup>a</sup> | R.T.<br>(min) <sup>b</sup> | Ion<br>mode | Metabolites                                                               | Adduct <sup>c</sup>     | Δ m <sup>d</sup> | VIP   | P value <sup>e</sup> | Fold<br>change <sup>f</sup> |
|------------------|----------------------------|-------------|---------------------------------------------------------------------------|-------------------------|------------------|-------|----------------------|-----------------------------|
| 377.086          | 0.698                      | NEG         | D-Lactose                                                                 | [M+Cl]-                 | 0.00080          | 24.27 | 2.2E-14              | 21.81                       |
| 179.056          | 0.714                      | NEG         | D-Fructose                                                                | [M-H]-                  | -0.00010         | 9.35  | 3.3E-13              | 0.15                        |
| 583.273          | 4.471                      | NEG         | 5beta-scymnol sulfate                                                     | [M+Cl]-                 | 0.00240          | 3.11  | 3.7E-13              | 0.27                        |
| 245.114          | 3.460                      | NEG         | Aspartyl-Isoleucine                                                       | [M-H]-                  | -0.00050         | 2.08  | 1.0E-12              | 0.42                        |
| 624.336          | 4.494                      | NEG         | Glycochenodeoxycholic acid 3-glucuronide                                  | [M-H]-                  | -0.00300         | 6.27  | 2.7E-12              | 0.18                        |
| 263.197          | 0.735                      | POS         | 2-Methylbutyroylcarnitine                                                 | [M+NH <sub>4</sub> ]+   | 0.00180          | 3.65  | 6.5E-12              | 0.24                        |
| 439.087          | 0.722                      | NEG         | 3,5-Dihydroxyphenyl 1-O-(6-O-galloyl-beta-D-glucopyranoside)              | [M-H]-                  | -0.00160         | 11.92 | 1.4E-10              | 18.36                       |
| 268.085          | 0.691                      | NEG         | Acetyl-L-tyrosine                                                         | [M+FA-H]-               | -0.00530         | 2.01  | 2.0E-10              | 0.23                        |
| 526.252          | 4.595                      | NEG         | N-[(3a,5b,7a,12a)-3,12-dihydroxy-24-oxo-7-(sulfoxy)cholan-24-yl]-Glycine  | [M-H <sub>2</sub> O-H]- | 0.00250          | 6.08  | 3.2E-10              | 0.28                        |
| 463.183          | 4.167                      | NEG         | 2-[4-(3-Hydroxypropyl)-2-methoxyphenoxy]-1,3-propanediol 1-glucoside      | [M+FA-H]-               | -0.00590         | 6.08  | 1.0E-09              | 0.54                        |
| 541.226          | 1.568                      | NEG         | Cinn cassiol 19-glucoside                                                 | [M-H]-                  | -0.00320         | 2.24  | 1.2E-09              | 0.49                        |
| 455.102          | 0.673                      | NEG         | 3,5,7-Tris(acetyloxy)-8-methoxy-2-(4-methoxyphenyl)-4H-1-benzopyran-4-one | [M-H]-                  | 0.00360          | 3.94  | 1.5E-09              | 17.27                       |
| 446.187          | 0.735                      | POS         | b-D-Xylopyranosyl-(1->4)-a-L-rhamnopyranosyl-(1->2)-L-arabinose           | [M+NH <sub>4</sub> ]+   | 0.00230          | 2.58  | 2.7E-09              | 15.03                       |
| 360.150          | 0.810                      | POS         | Sucrose                                                                   | [M+NH <sub>4</sub> ]+   | 0.00190          | 2.10  | 3.7E-09              | 25.35                       |
| 128.036          | 0.958                      | NEG         | L-Glutamate                                                               | [M-H <sub>2</sub> O-H]- | -0.00070         | 6.63  | 4.0E-09              | 0.59                        |
| 514.215          | 1.413                      | NEG         | Alpha-Trisaccharide                                                       | [M-H]-                  | 0.00120          | 3.16  | 4.5E-09              | 0.58                        |
| 521.172          | 0.708                      | NEG         | O-Desmethylquinidine glucuronide                                          | [M+Cl]-                 | 0.00350          | 2.27  | 5.9E-09              | 6.34                        |
| 152.036          | 1.063                      | POS         | 2-Methoxy-4-nitrophenol                                                   | [M+H-H <sub>2</sub> O]+ | 0.00070          | 2.44  | 9.4E-09              | 5.39                        |
| 203.065          | 0.725                      | NEG         | L-beta-aspartyl-L-alanine                                                 | [M-H]-                  | -0.00190         | 2.16  | 1.5E-08              | 0.30                        |
| 593.195          | 0.743                      | NEG         | punaglandin                                                               | [M+Cl]-                 | 0.00310          | 2.48  | 2.6E-08              | 15.63                       |
| 132.030          | 0.693                      | NEG         | L-Aspartic Acid                                                           | [M-H]-                  | -0.00040         | 4.82  | 5.8E-08              | 0.36                        |
| 168.991          | 0.765                      | NEG         | D-Glyceraldehyde 3-phosphate                                              | [M-H]-                  | 0.00040          | 4.24  | 6.3E-08              | 0.50                        |
| 281.156          | 3.887                      | POS         | 7-(4-Hydroxyphenyl)-1-phenyl-4-hepten-3-one                               | [M+H]+                  | 0.00270          | 2.53  | 7.1E-08              | 0.28                        |
| 231.023          | 0.716                      | NEG         | 6,7-Benzocoumarin                                                         | [M+Cl]-                 | 0.00200          | 3.19  | 8.7E-08              | 0.12                        |
| 118.051          | 0.684                      | NEG         | L-Threonine                                                               | [M-H]-                  | -0.00030         | 2.04  | 8.9E-08              | 0.42                        |
| 367.103          | 0.714                      | NEG         | 5-O-Feruloylquinic acid                                                   | [M-H]-                  | -0.00010         | 2.84  | 9.0E-08              | 0.04                        |
| 241.118          | 5.030                      | NEG         | L-gamma-glutamyl-L-isoleucine                                             | [M-H <sub>2</sub> O-H]- | -0.00210         | 2.58  | 9.3E-08              | 0.45                        |
| 226.012          | 0.832                      | NEG         | L-Glutamyl 5-phosphate                                                    | [M-H]-                  | -0.00010         | 2.25  | 1.1E-07              | 0.30                        |
| 431.109          | 0.740                      | NEG         | TyrMe-Asp-OH                                                              | [M-H]-                  | -0.00070         | 2.16  | 1.2E-07              | 5.71                        |
| 147.066          | 1.221                      | NEG         | Mevalonic acid                                                            | [M-H]-                  | -0.00040         | 2.14  | 3.3E-07              | 5.68                        |
| 465.199          | 4.177                      | POS         | Acarbose                                                                  | [M+H-H <sub>2</sub> O]+ | 0.00100          | 4.53  | 3.9E-07              | 0.64                        |
| 513.025          | 0.706                      | NEG         | Fucofuroeckol B                                                           | [M+Cl]-                 | 0.00250          | 3.17  | 5.0E-07              | 12.66                       |
| 387.116          | 0.670                      | NEG         | Fructoselysine 6-phosphate                                                | [M-H]-                  | -0.00180         | 4.20  | 7.8E-07              | 7.65                        |
| 260.090          | 0.741                      | NEG         | Aspartyl-Glutamine                                                        | [M-H]-                  | 0.00110          | 2.26  | 9.4E-07              | 0.41                        |
| 381.079          | 0.691                      | POS         | Dihydrocaffeic acid 3-O-glucuronide                                       | [M+Na]+                 | 0.00010          | 4.84  | 1.6E-06              | 14.84                       |
| 117.056          | 3.506                      | NEG         | 3-hydroxy valeric acid                                                    | [M-H]-                  | -0.00010         | 2.75  | 1.6E-06              | 2.54                        |
| 606.075          | 0.830                      | NEG         | Uridine diphosphate-N-acetylglucosamine                                   | [M-H]-                  | 0.00030          | 6.91  | 3.4E-06              | 0.44                        |
| 587.159          | 0.715                      | NEG         | Aurasperone E                                                             | [M-H]-                  | 0.00340          | 4.63  | 4.1E-06              | 6.74                        |
| 565.048          | 0.824                      | NEG         | UDP-glucose                                                               | [M-H]-                  | 0.00040          | 8.34  | 8.2E-06              | 0.40                        |
| 476.048          | 0.757                      | NEG         | CDP-glycerol                                                              | [M-H]-                  | 0.00070          | 2.76  | 8.6E-06              | 0.33                        |
| 131.071          | 5.132                      | NEG         | D-Leucic acid                                                             | [M-H]-                  | -0.00010         | 4.96  | 8.6E-06              | 2.03                        |
| 474.146          | 0.701                      | NEG         | Trp-Leu-OH                                                                | [M+Cl]-                 | 0.00340          | 2.83  | 8.9E-06              | 11.23                       |
| 160.062          | 0.964                      | NEG         | 4-Methyl-L-glutamate                                                      | [M-H]-                  | 0.00020          | 2.75  | 1.1E-05              | 1.84                        |
| 251.078          | 0.891                      | NEG         | Deoxyinosine                                                              | [M-H]-                  | -0.00090         | 3.37  | 2.0E-05              | 1.63                        |
| 470.261          | 4.076                      | POS         | Sphingofungin A                                                           | [M+K]+                  | -0.00160         | 2.05  | 3.0E-05              | 0.37                        |
| 146.118          | 0.755                      | POS         | 2-amino-heptanoic acid                                                    | [M+H]+                  | 0.00000          | 8.59  | 3.9E-05              | 0.53                        |
| 323.029          | 0.884                      | NEG         | Uridine monophosphate (UMP)                                               | [M-H]-                  | 0.00050          | 2.59  | 8.6E-04              | 0.63                        |
| 302.246          | 12.918                     | POS         | All-Trans-3,4-Didehydro Retinol                                           | [M+NH <sub>4</sub> ]+   | -0.00050         | 2.76  | 6.1E-03              | 0.37                        |

<sup>a</sup>M/Z, mass/charge number of each peak in mass spectra. <sup>b</sup>R.T.(min), retention time of each metabolite in chromatography. <sup>c</sup>The formation of each peak in mass spectra. <sup>d</sup>Δm, the mass discrepancies between measured values and theoretical values during metabolite identification in database HMDB and METLIN. <sup>e</sup> Differences between the control and the Cd-treated were analyzed using one-way analysis of variance (ANOVA), followed by the Tukey post hoc test. *P* < 0.05 is considered as significant. <sup>f</sup>The change of metabolite abundance is expressed as the ratio of the average content in Cd exposed group and in control (CCFM8610 (Cd)/CCFM8610(0)) (n=6). A

value >1 represents upregulation, while a value <1 indicates downregulation.

Table S3 Changed metabolites in *Lactobacillus plantarum* CCFM191 after Cd exposure

| M/Z <sup>a</sup> | R.T.<br>(min) <sup>b</sup> | Ion<br>mode | Metabolites                                                          | Adduct <sup>c</sup>     | $\Delta m^d$ | VIP   | P value <sup>e</sup> | Fold<br>change <sup>f</sup> |
|------------------|----------------------------|-------------|----------------------------------------------------------------------|-------------------------|--------------|-------|----------------------|-----------------------------|
| 168.991          | 0.765                      | NEG         | D-Glyceraldehyde 3-phosphate                                         | [M-H]-                  | 0.00040      | 7.74  | 2.0E-14              | 0.05                        |
| 429.199          | 3.412                      | NEG         | Ptilosteroid B                                                       | [M-H]-                  | 0.00380      | 12.35 | 1.7E-11              | 2.32                        |
| 463.183          | 4.167                      | NEG         | 2-[4-(3-Hydroxypropyl)-2-methoxyphenoxy]-1,3-propanediol 1-glucoside | [M+FA-H]-               | -0.00590     | 7.47  | 1.5E-09              | 1.56                        |
| 117.056          | 3.506                      | NEG         | 3-hydroxy valeric acid                                               | [M-H]-                  | -0.00010     | 5.30  | 4.2E-09              | 3.28                        |
| 606.075          | 0.830                      | NEG         | Uridine diphosphate-N-acetylglucosamine                              | [M-H]-                  | 0.00030      | 9.28  | 5.1E-09              | 0.15                        |
| 447.156          | 2.235                      | NEG         | HoPhe-HoPhe-OH                                                       | [M-H]-                  | -0.00060     | 2.52  | 5.3E-09              | 3.11                        |
| 190.054          | 4.175                      | NEG         | N-Acetyl-DL-methionine                                               | [M-H]-                  | -0.00060     | 2.97  | 7.0E-09              | 1.81                        |
| 160.062          | 0.964                      | NEG         | 4-Methyl-L-glutamate                                                 | [M-H]-                  | 0.00020      | 6.33  | 1.5E-08              | 2.63                        |
| 147.066          | 1.221                      | NEG         | Mevalonic acid                                                       | [M-H]-                  | -0.00040     | 6.22  | 1.5E-08              | 16.47                       |
| 431.214          | 3.445                      | POS         | Palmitoylglycerone phosphate                                         | [M+Na]+                 | -0.00260     | 12.73 | 2.4E-08              | 2.52                        |
| 316.115          | 0.741                      | NEG         | N4-(b-N-Acetyl-D-glucosaminy)-L-asparagine                           | [M-H <sub>2</sub> O-H]- | -0.00080     | 2.26  | 3.9E-08              | 1.93                        |
| 149.028          | 3.723                      | NEG         | 2-Hydroxy-4-(methylthio)butanoic acid                                | [M-H]-                  | -0.00020     | 3.20  | 5.8E-08              | 3.15                        |
| 217.082          | 1.026                      | NEG         | Glutamylalanine                                                      | [M-H]-                  | -0.00100     | 2.01  | 7.3E-08              | 0.59                        |
| 251.078          | 0.891                      | NEG         | Deoxyinosine                                                         | [M-H]-                  | -0.00090     | 4.48  | 7.9E-08              | 1.53                        |
| 298.097          | 4.125                      | POS         | (methylthio)adenosine                                                | [M+H]+                  | 0.00030      | 3.19  | 8.2E-08              | 0.56                        |
| 131.071          | 5.132                      | NEG         | D-Leucic acid                                                        | [M-H]-                  | -0.00010     | 8.51  | 1.4E-07              | 2.03                        |
| 449.171          | 2.276                      | POS         | Desmethylnianserin glucuronide                                       | [M+Na]+                 | 0.00220      | 2.09  | 1.9E-07              | 2.94                        |
| 271.227          | 10.986                     | NEG         | 4-hydroxy palmitic acid                                              | [M-H]-                  | -0.00070     | 2.18  | 2.5E-07              | 2.03                        |
| 241.118          | 5.030                      | NEG         | L-gamma-glutamyl-L-isoleucine                                        | [M-H <sub>2</sub> O-H]- | -0.00210     | 2.96  | 6.6E-07              | 0.57                        |
| 610.185          | 14.959                     | POS         | Peonidin 3-rhamnoside 5-glucoside                                    | [M+H]+                  | -0.00470     | 9.70  | 1.1E-06              | 20.30                       |
| 389.203          | 1.891                      | POS         | Doxylamine succinate                                                 | [M+H]+                  | -0.00390     | 3.34  | 1.5E-06              | 1.93                        |
| 321.049          | 1.069                      | NEG         | dTMP                                                                 | [M-H]-                  | -0.00020     | 2.09  | 1.7E-06              | 2.25                        |
| 613.184          | 14.959                     | POS         | 12-Dihydrodalbinol O-glucoside                                       | [M+Na]+                 | -0.00570     | 3.61  | 2.5E-06              | 26.15                       |
| 116.070          | 0.724                      | POS         | L-Proline                                                            | [M+H]+                  | -0.00010     | 3.53  | 4.4E-06              | 1.87                        |
| 465.199          | 4.177                      | POS         | Acarbose                                                             | [M+H-H <sub>2</sub> O]+ | 0.00100      | 6.92  | 4.7E-06              | 1.62                        |
| 116.036          | 0.907                      | NEG         | 2S-amino-3-oxo-butanoic acid                                         | [M-H]-                  | 0.00070      | 3.83  | 6.6E-06              | 1.92                        |
| 338.989          | 0.814                      | NEG         | alpha-D-Glucose 1,6-biphosphate                                      | [M-H]-                  | 0.00030      | 2.19  | 9.6E-06              | 0.55                        |
| 565.048          | 0.824                      | NEG         | UDP-glucose                                                          | [M-H]-                  | 0.00040      | 4.43  | 9.9E-06              | 0.54                        |
| 446.187          | 0.735                      | POS         | b-D-Xylopyranosyl-(1->4)-a-L-rhamnopyranosyl-(1->2)-L-arabinose      | [M+NH <sub>4</sub> ]+   | 0.00230      | 2.18  | 3.1E-05              | 0.58                        |
| 302.171          | 1.911                      | POS         | N-[(4-Hydroxy-3-methoxyphenyl)methyl]octanamide                      | [M+Na]+                 | -0.00150     | 2.22  | 5.2E-05              | 1.72                        |
| 299.259          | 12.254                     | NEG         | DL-2-hydroxy stearic acid                                            | [M-H]-                  | -0.00060     | 4.50  | 6.7E-05              | 0.60                        |
| 349.054          | 0.757                      | NEG         | Pentahydroxyflavanone                                                | [M+FA-H]-               | -0.01000     | 2.29  | 1.8E-04              | 2.20                        |
| 130.050          | 0.831                      | POS         | 4-Oxoproline                                                         | [M+H]+                  | 0.00020      | 2.57  | 8.5E-04              | 0.61                        |
| 413.267          | 12.362                     | POS         | cholan-24-oic acid                                                   | [M+Na]+                 | 0.00040      | 2.53  | 5.6E-03              | 1.86                        |
| 265.180          | 14.886                     | POS         | 5-Hydroxy-1-(4-hydroxyphenyl)-3-decanone                             | [M+H]+                  | 0.00030      | 2.01  | 6.5E-03              | 1.80                        |
| 356.280          | 14.888                     | POS         | 5,6-dihydroxy-8,11,14-eicosatrienoic acid                            | [M+NH <sub>4</sub> ]+   | 0.00200      | 3.73  | 6.5E-03              | 1.78                        |

<sup>a</sup>M/Z, mass/charge number of each peak in mass spectra. <sup>b</sup>R.T.(min), retention time of each metabolite in chromatography. <sup>c</sup>The formation of each peak in mass spectra. <sup>d</sup> $\Delta m$ , the mass discrepancies between measured values and theoretical values during metabolite identification in database HMDB and METLIN. <sup>e</sup> Differences between the control and the Cd-treated were analyzed using one-way analysis of variance (ANOVA), followed by the Tukey post hoc test.  $P < 0.05$  is considered as significant. <sup>f</sup>The change of metabolite abundance is expressed as the ratio of the average content in Cd exposed group and in control (CCFM191 (Cd)/CCFM191(0)) (n=6). A value >1 represents upregulation, while a value <1 indicates downregulation.

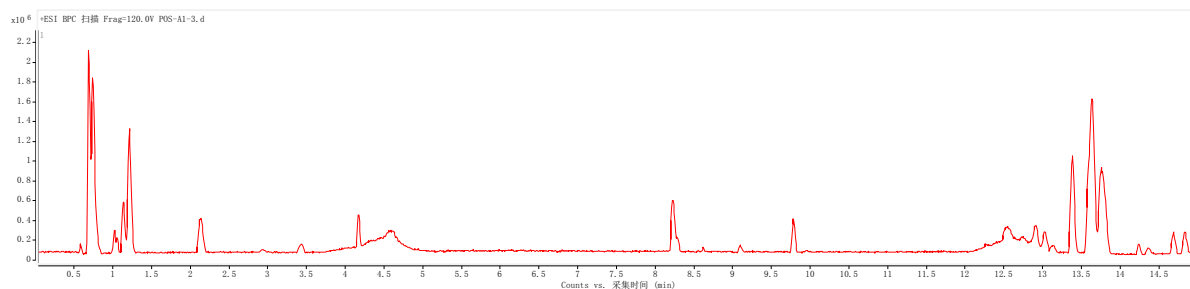

Figure S1 The representative base peak intensity (BPI) chromatogram of CCFM8610 without Cd in positive ion mode.

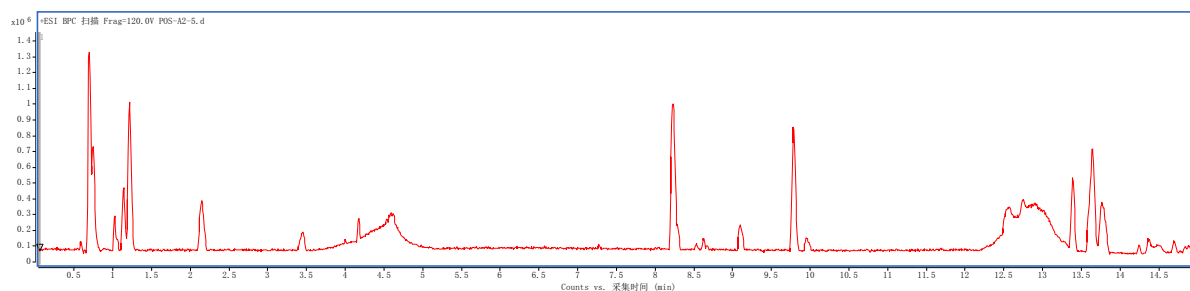

Figure S2 The representative BPI chromatogram of CCFM8610 with Cd in positive ion mode.

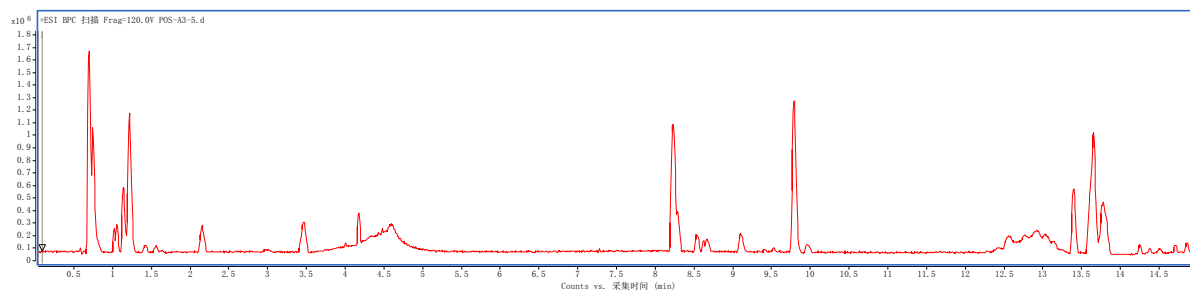

Figure S3 The representative BPI chromatogram of CCFM191 without Cd in positive ion mode.

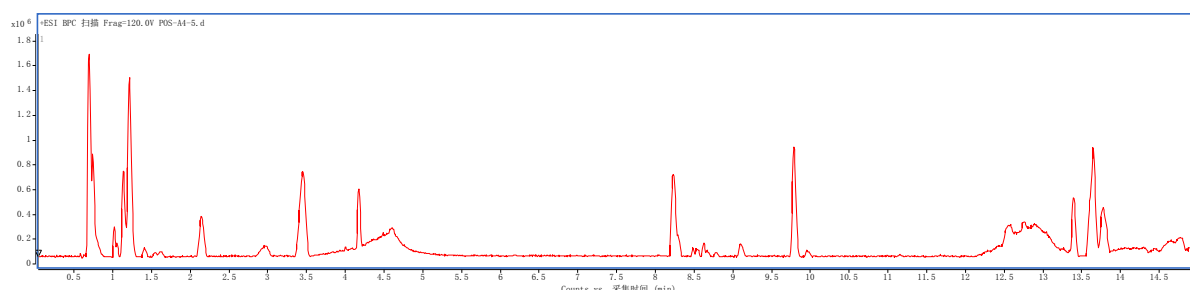

Figure S4 The representative BPI chromatogram of CCFM191 with Cd in positive ion mode.



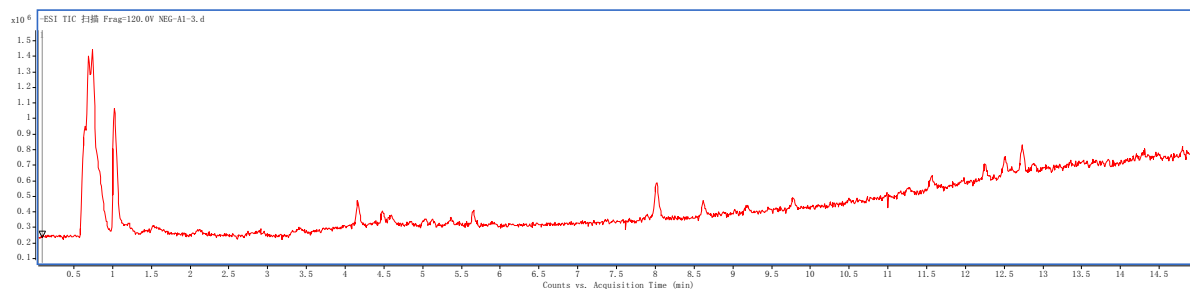

Figure S5 The representative BPI chromatogram of CCFM8610 without Cd in negative ion mode.

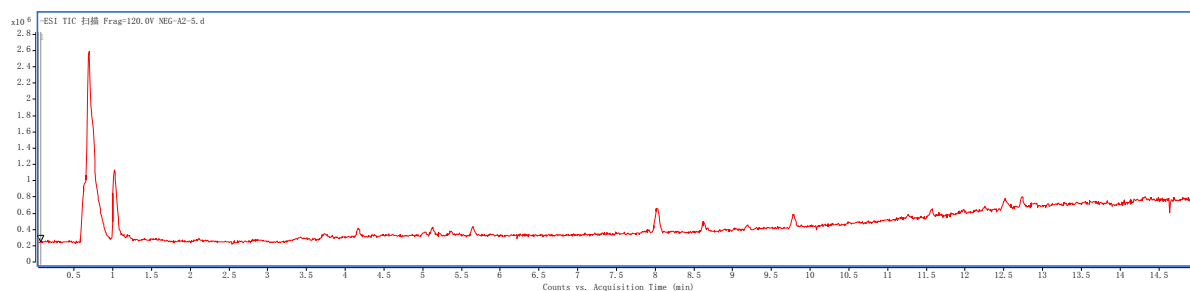

Figure S6 The representative BPI chromatogram of CCFM8610 with Cd in negative ion mode.

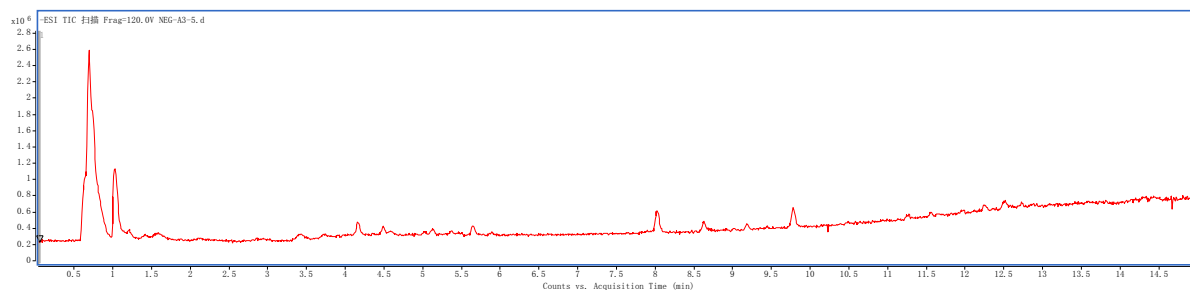

Figure S7 The representative BPI chromatogram of CCFM191 without Cd in negative ion mode.

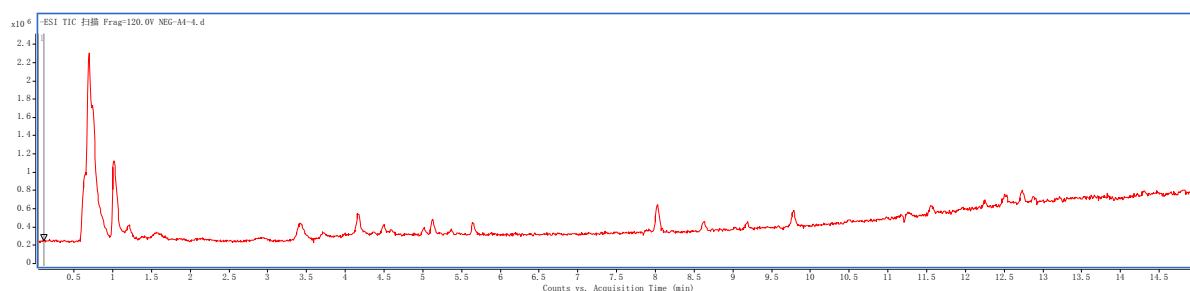

Figure S8 The representative BPI chromatogram of CCFM191 with Cd in negative ion mode.



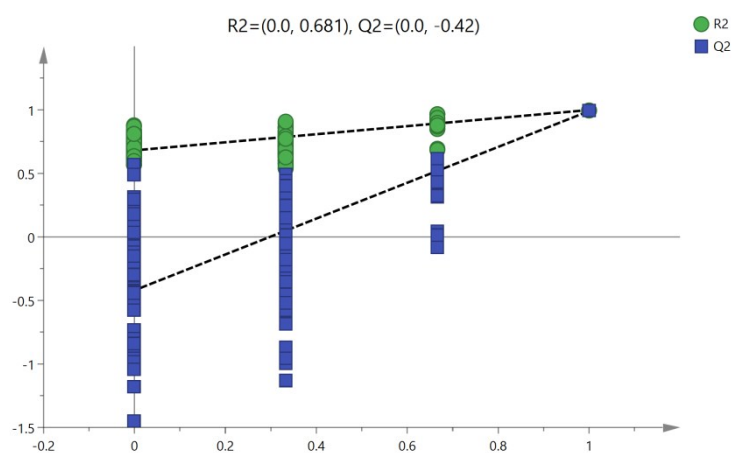

Figure S9 Cross-validation of the pair-wise orthogonal partial least-squares discriminant analysis (OPLS-DA) model of CCFM8610/CCFM191.

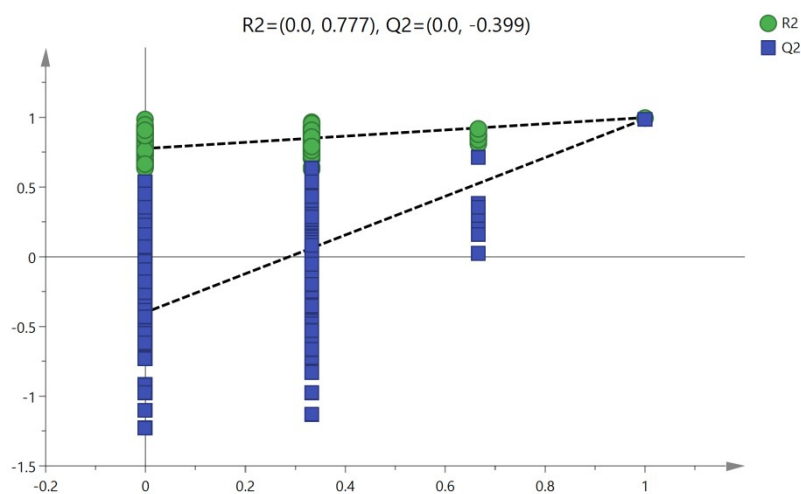

Figure S10 Cross-validation of the OPLS-DA model of CCFM8610(Cd)/8610(0).

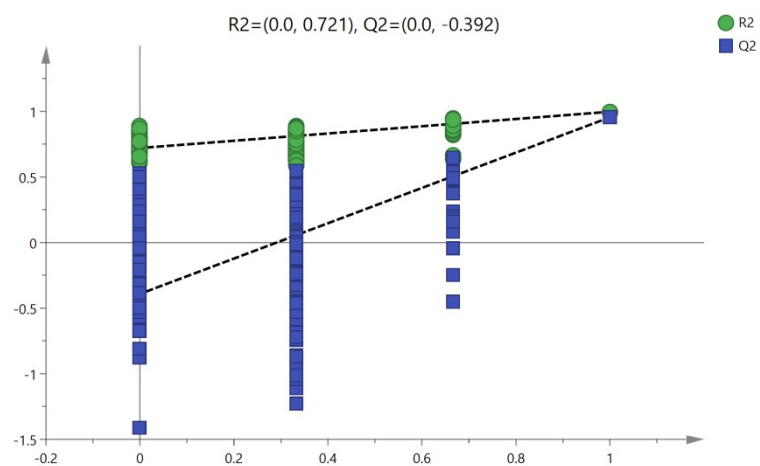

Figure S11 Cross-validation of the OPLS-DA model of CCFM191(Cd)/CCFM191(0).
